# Supplementary material for: Differential expression of chemosensory-protein genes in midguts in response to diet of Spodoptera litura
Source: PubMed Central journal article supplement (PMC5428418; doi:10.1038/s41598-017-00403-5), 2017-03-22
Supplement: 41598_2017_403_MOESM1_ESM.pdf [file 41598_2017_403_MOESM1_ESM.pdf]

Differential expression of chemosensory-protein genes in midguts in  
response to diet of *Spodoptera litura*

Xin Yi<sup>#1</sup>, Jiangwei Qi<sup>#1</sup>, Xiaofan Zhou<sup>#2</sup>, MeiYing Hu<sup>1</sup>, GuoHua Zhong<sup>\*1</sup>

*1 Laboratory of Insect Toxicology, Key Laboratory of Pesticide and Chemical Biology,*

*Ministry of Education, South China Agricultural University, Guangzhou, People's*

*Republic of China*

*2 Guangdong Province Key Laboratory of Microbial Signals and Disease Control,*

*Integrative Microbiology Research Centre, College of Agriculture, South China*

*Agricultural University, Guangzhou, China*

---

<sup>#</sup> All authors contributed equally to this work.

<sup>\*</sup> Correspondence to: Prof GuoHua Zhong. Key Laboratory of Pesticide and Chemical Biology, Ministry of Education, PR China, College of Natural Resources and Environment, South China Agricultural University, Guangzhou 510642, China. E-mail: guoHuazhong@scau.edu.cn. Tel: +86-20-85280308; Fax: +86-20-85280292

Supplementary Fig. 1 Expression and purification of three candidate SlitCSPs

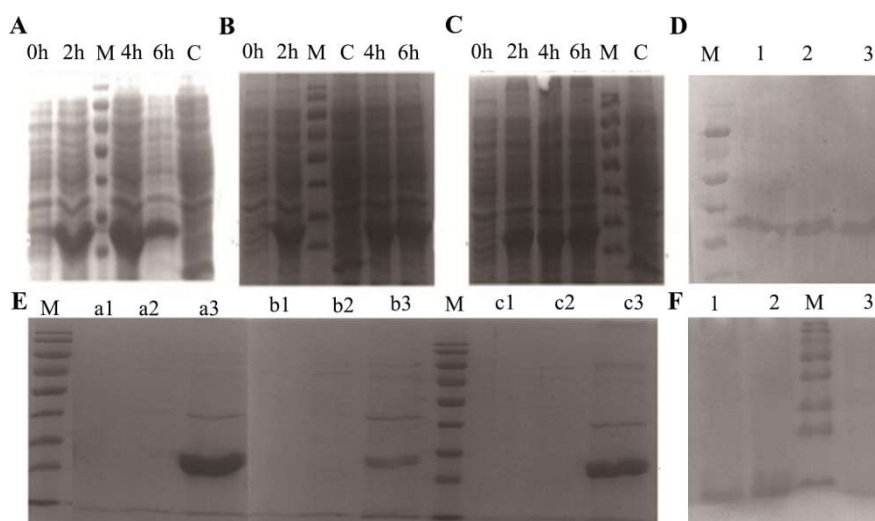

A, 12% SDS-PAGE of the expressed fusion protein of SlitCSP6; 0h: 0h IPTG inducing of fusion protein; 2h: 2h-inducing of fusion protein; M: molecular weight marker of 10, 15, 25, 35, 40, 55, 70, 100, 130 and 170 KDa. C: empty vector; B, 12% SDS-PAGE of the expressed fusion protein of SlitCSP1; 0h: 0h IPTG inducing of fusion protein; 2h: 2h-inducing of fusion protein; M: molecular weight marker of 10, 15, 25, 35, 40, 55, 70, 100, 130 and 170 KDa. C: empty vector; C, 12% SDS-PAGE of the expressed fusion protein of SlitCSP2; 0h: 0h IPTG inducing of fusion protein; 2h: 2h-inducing of fusion protein; M: molecular weight marker of 10, 15, 25, 35, 40, 55, 70, 100, 130 and 170 KDa. C: empty vector; D, Western blot results of purification of the protein. M: molecular weight marker of 10, 15, 25, 35, 40, 55, 70, 100, 130 and 170 KDa; 1: SlitCSP11; 2: SlitCSP3; 3: SlitCSP8. E, Purification was accomplished by HisTrap affinity columns. M: molecular weight marker of 10, 15, 25, 35, 40, 55, 70, 100, 130 and 170 KDa; a: SlitCSP11; b: SlitCSP3; c: SlitCSP8; 1: the protein sample was washed by buffer B; 2: the protein sample was washed by buffer C; 3: the protein sample was washed by buffer E. F: 12% SDS-PAGE analysis after the protein was subjected to Bovine Enterokinase overnight to remove the His-tag. M: molecular weight marker of 10, 15, 25, 35, 40, 55, 70, 100, 130 and 170 KDa; 1: SlitCSP11; 2: SlitCSP3; 3: SlitCSP8.

Table 1S Chemosensory protein identified in fasta format

> comp22025\_c0 (SlitCSP21)

TCGTTGGTCGGACGTAACCTAAATATTCGGCTCCGTTTCTACTACAACCTTCAGTGATAA  
A  
ATATTGAAATTAATCCGTGCAAAGTGGGCGTTTCTATAATGCAGATCATCGTAGTTTTT  
GTGGTGGCGTGTGTGGGTTTGGTAGCCGGCTTGCATGTGCAGGCTGGGCCACAAATGA  
CA  
GACGCACAATTAGAACAGACTTTAGCCGATAAGAGCACGATGCAGCGACACATTAAAT  
GC  
GCACTCGGTGAAGGACCTTGCATCCTGTTGGGAGACGATTACGAACTTTAGCCCCGT  
TA  
GTACTACGAGGGGCCTGTCCACAATGTTCTATGCAGGAGACGCGCCAGATTCGACGCA  
CC  
CTTGCCCTTCGTACAACGCAACTACCCATGGGAGTGGGCGAAAATTGTTCCCAATACG  
GT  
TAA

> comp19189\_c0 (SlitCSP26)

AGGTGTGTTCTTCAGTGTTATTCATTGTATCAGAGATTAACCAAAGCTTGAAGATGAA  
G  
GTACTAGTAGCGTTGTCCATATTCGTCTACTAGCAGCAGCAGTACCAATTACAAAGGA  
T  
GAGTTCGCTACACTTGAGGCATTCGACTATGACGCCCTATTCGCTGATGAAGAGAACA  
GA  
AAAATGGTCTTCGATTGCTTGCTAGATAAAGGAGATTGTGGTCCTTACAAACAAATCGT  
T  
GAGCTGTCAATGAAAATAATACTTAGCAACTGTGCAGAATGTTCTCCATCCCAGAAGGC  
G  
AAATACGATCACGTACTAAAAGTATTGAAGGAAGACTATGCGTCCTTCTTCAATGAACT  
C  
ATGCAGAAAGCTGCTTCCAAAAAGGAAAAACATTAA

> comp18805\_c0 (SlitCSP2)

ATAAATATAGGACAGGTCGCCGAGTACAGCACTCAGCTGTTAGACAGTGATCGAGATTC  
A  
CCTATCAGTGTAAGGAGGCCAGTAATCATGAAGGTAGCGCTACTCACACTCTGCTTCGC  
T  
CTTGGAGTCCTCGCACAGGATATGTACGAGAATGCCAACGACAACCTTTGACATCTCTG  
AG  
GTTCTGGGCAATGAAAGGCTCCTCAACTCCTATGCTAAGTGCCTACTCAACAAGGGAC  
CT  
TGCACTCCAGAAGTAAAGCAAGTTAAAGATAAATTGCCGGAAGCTCTGGAAACTCGGT  
GT  
GCAAAATGTACGGATAAACAAGCAAATGGGCAAGACTTTGGCTCAAGAAGTGAAG  
AAA  
AATCATCCCGACATCTGGAAGCAACTGGTGGCAATGTACGACCCTGAAGGCAAATACC

AA  
CAAGCGTGGAAGGACTTCCTCCAAGAATAA  
> comp21913\_c0 (SlitCSP10)  
GTTTTAGTTTAACTAGAAATAATAGATTAATAAATGCGTGCAGTGTGTTACTTTGTGCT  
CTAGTGCATTTAGTGGTGGGACAAGATGTTAATGACATGGTAAACATGCCTAAATACGA  
T  
CAGAGATACGATTATTTGGACGTCGATGCAATTTTCACGAACAAGAGACTCGTTAGGA  
AC  
TATGTGGATTGTTTGATTAATGCTGTTCGGTGCACGCCTGAAGGAAAAGCGCTGAAAC  
GA  
ATACTCCCAGAAGCGTTGAGGACGAAATGTGTCCGCTGCACAGAGCGACAGAAGAGA  
ACA  
GCAGTGAAGGTGATCAAGCGGCTGAAGAACGAATATCCTGACGAATGGTCCAAGCTTG  
CT  
TCCCGGTGGGACCCCACTGGGGACTTCACCAGATACTTCGAAGAATTCCTCGCTAAAG  
AA  
CACTATAACACCATCCCAGGATCAGGCAGTGCCTCCCTACGTCATCACCGTTAGCACC  
A  
CCACGTGTACCACAATCACCACCAGCTACCAACCCGACTCCAGGCCCCACGGAGCCTA  
CC  
CCACCGAGGCCTATTGTACTGAACAGGTTTGGTGACGACGGCGAGCTGATGATGGGCA  
GT  
CCATCGTCAGCGGGTATTACTCCGAGACCGATGACTCAGGCCACTACGAGACCCAGCA  
CT  
ACCACGAGGCCGCTAGTACTAGGCCTGTACCACCCAGACCGACAATGATGACATGGG  
CT  
GGTGCAGCGTCCAACACGCAGGCGACGCGTTTCCCATTGCGGCCTGTATCAGAAATAT  
CA  
CCACCATACTCCACGGCCATAACCCTCATCGACCAGATCGGATACAAAATAATAAAGAC  
A  
ACAGAACTTGTCACCGATTTACTCAGGAACACCGTTAGAGCTGTCGTTGGTCGGTAG  
> comp13897\_c0 (SlitCSP25)  
GAGCTATCAATGGTCTCAGTCATAATGTGGGCTCAAGCGATTCCGTACTIONGATTGTTGTA  
CATGTGGTGTGAGGAGATCAGGATATGCCTGGGTTTCGTGAGAGAAATGAGCGATGGTG  
TA  
GAGAGTAGAGGCTTCAAGATCATTTACGGCGATGAAGACATGACCATTATCAACCAAG  
TG  
GTCAGTGAAGCCGAAAAAGGCAGTGCTTTTAAGAAGAGAGCACATTTAAATGAGGCTA  
TT  
AAGCCCTTACCAGCGCAAGATGTCAAGTGCTTGATGTCTGTGGATCGGTACTGTAGCA  
AG  
GAGATGGGGCTGATGAAAAGTGTATTGATACAAGCTGTAAAAGATGACTGCGTGAAAT  
GT  
TCAGTACAGCAGAAGGATCAAGCTGGGAAAGTGATTGCGTCCATGATGGCTCATGATC

CC  
GTCGCTTGAAAGTTTTCTCACCAGGTACGACGGAATCAAAAAAGTTCAAAGGATAC  
TA  
GGATAG

> comp10232\_c0 (SlitCSP6)

GAGTGTCCACTATACTCTTGGACAGGATTCTATTGTCTAGTGATCGGATTTTTAACTT  
ACTTACAGTATGAATTTCTCGTGTTGTCGATTGTGGTTACAATGGCGGCCTTCGTAGCT  
GCTGAAACTTATACGGACAGATACGATCACATCAACATCGACGAGATCATTGAGAACA  
GG  
AAACTGCTGGTGCCTTACATTAAGTGTACCCTGGACCAAGGAAGATGTACTCCAGAAG  
GC  
AGGGAAGTAAAGCTCATATCAAGGACGCTATGCAGACCTCCTGCTCCAAATGTACTG  
AG  
AAACAGAAGAAGGGTGCCAGGAAGGTCGTCAGACACATCAGGGCCAAGGAACAGGA  
GTAC  
TGGAAGCAGATCCTCGCCAAGTACGACCCTGAAGACCAATACAAAGAGAACTACGAA  
ACC  
TTCCTCGCTGCTGAAGACTAA

> comp19007\_c0 (SlitCSP9)

TTTAAACAATCCTTCACCATGAAAGTCGTGTTCTCGTGTGTGTGTTGGCTGCAGTGGT  
G  
TACGCCACCCTCATGAGTCCCATTACACGGACAAATGGGACAACATCGACCTGGACG  
AG  
ATCCTAAACAACAAGAAAATCCTGGCTTCTTATGTGAAATGCTGCCTGGACCAGGGCA  
AG  
TGACACCTGATGCCAAGGAATTGAAGTCGCACATTAAGGAAGCTTTGGAAAATCGAT  
GT  
GGTAAATGTACCCAGCTCAGAAGGATGGTACTCGCAAGGTGTTGACACACCTCATCA  
AC  
CACGAGCCAGAAATGTGGAACCAGCTCTGCGAGAAATACGACGCCGAAGGCAAATAC  
AGA  
AAAATGTATGAAGACGAATACAAATCCGTAAACACTAA

> comp16603\_c0 (SlitCSP8)

AACGCACTCCATCTCACCCTGAACAAACCTCTCATACAAACAGAATCAAATGAAGT  
CC  
ATGATCGTGCTCTGCGTGCTGTCGGTGGCGGCGCTGGTGGTGGCGCGGCCCGACGACT  
CC  
CACTACACCGACCGCTACGACAACGTCAACCTGGACGAAATCCTCTCCAACCGCCGCC  
TG  
CTGGTGCCCTACGTCAAGTGCATCCTCGACCAGGGCAAGTGCGCCCTGACGCCAAGG  
AG  
CTAAAGGAACACATCAGGGAAGCCCTGGAGAACGAATGTGGCAAATGTACTGAGACC  
CAG  
AAGAACGGAACCCGGCGTGTGATCGAGTACTTGATCAACAACGAGGAGGAGTACTGG

AAC  
GAGCTCACGGTCAAGTACGACCCTGAGAGGAAGTACACCGCCAAGTACGAGAAGGAA  
CTC  
AAGAAGATCAAGGCTTAA  
> comp13797\_c3 (SlitCSP5)  
GCTGTTGGGCAGTACTCCTCAGGAAAACACGATCAAAGAATGAAATCCTTCATAGTTT  
TG  
TGTTTGTTCGGTCTGGCTGCGGTGGCTCTGGCCAAGCCTAATGGCAGCACTTACACTG  
AC  
AGATACGACAACGTCAATCTGGATGAGATCCTTGGTAATCGTCGTCTCCTGACGCCTTA  
C  
ATTAAGTGCATCCTCGAAGAGGGCAAGTGCCTGCTGATGGCAAGGAACTGAAATCTC  
AC  
ATCAGGGAGGCTTTAGAACAGAACTGTGCCAAATGTACCGATGCTCAGCGCAGTGGAA  
CC  
CGTAGGGTCTTGGGCCACATCATCAACAATGAGGAGGAATCCTGGAACCGTCTCAAGG  
CT  
AAATATGACCCCGAGTCCAAATACACTGTCAAATACGAACTGGAACCTCAGAAAAGTGA  
AG  
CAATAA  
> comp19433\_c0 (SlitCSP1)  
GTCACCTGGCTACTTGAGATTACCGTACACATCAGGAACAAAACGGACAACATGAAAT  
TC  
GTACTAGTATTGTGCCTGATGACTGCCGCAGTCTTGGCTGAAGATGAAAAGTACCCTAG  
C  
AAGTACGACAACATCGACCTGGATGAGATCCTTGCCAACAAGAGGCTCCTCACTGCCT  
AC  
GTCAACTGCATCATGGAGAGAGGAAAGTGCAGTCCTGAGGGCAAGGAACTGAAAGA  
ACAT  
CTGGTAGACGCCATTGAGACTGGATGCTCGAAATGTACTGAAGCTCAAGAAAAGGGA  
GCA  
TACAAGGTCATCGAACACCTGATCCAGAACGAGCTGGACACCTGGCATGAGCTGACCG  
AC  
AAGTACGACTCCTCTGGCAAGTGGAGGAAGACATACGAAGACCGCGCCAGGGCTAAC  
GGC  
ATCGTCATCCCAGAATAA  
> comp19885\_c0 (SlitCSP14)  
GATTGCGAATTCATGGTACAGCCCAGCGAAGGGTTCGAACGGAGCTCACGGGAAATA  
CGA  
TACAAAATGAACTAATCATCGTACTCGCTTTATGTGTGGTGGCAGTGGCTTGGGCTAG  
G  
CCTGCCTCCACCTACACCGATAAGTGGGATAACATCAACGTAGACGAGATCTTAGAGTC  
C  
CAGCGTCTACTAAAAGCGTACGTAGACTGCTTGGCTCGACAGAGGACGTTGCACTCCTG

AT  
GGGAAAGCCCTCAAAGAACTCTCCCTGACGCCTTAGAACATGAGTGTAGCAAATGTA  
CT  
GAAAAACAAAAGAAGAGCTCGGACAAGGTCATCAGGCACTTGGTGAATAAACGCCCA  
GAC  
TTGTGGCAGGAGTTATCAGGAAAGTATGACCCTGAGAATATCTACCAGGAGAGGTACA  
AA  
ACCCAGCTTGACGCAGTAAAGCGACATTAA

> comp24113\_c0 (SlitCSP4)

TTGAACGAAGCTGTATTTTCTTCAGCTATTCTTGGGAATGATGAAGAAGTCATTTATAACA  
ATGATGCTTCTAATATACTTGACCATTGAGCAATGCTACGGAGACATCCACGTATACG  
ACAAAGTATGATGGAATTGATCTGGATGAGATACTTAGCAACGACCGTCTGCTGACTGG  
G  
TATGTCAACTGTCTGATGGATCTTGGACCTTGCACGGCTGATGGAAAAGAATTAATAAA  
AG  
AACCTTCCGGATGCTATAGAGAATGATTGTAAGAAGTGTACTGAGCGACAGCGTGAGG  
GT  
GCTGACCGTGTCTGTCATTACCTCATCGACAATAGACCCGAAGAATGGACTAAACTCG  
AG  
GAGAAATACAAATCGGATGGAAGTTACAGAGCTAAATATTTAGCTAGCAAGGAAGCCA  
CA  
GATGAGAAGGCATCAAATGTCACAACTCCAATGAAGATACAAATAATGTTTCTAAAG  
AA  
TAA

> comp19885\_c0 (SlitCSP15)

CAAACAAGGCTTTATATACAACCTAGGTATTTCACTTCCTCGGCAGTTGTGTTTTTCTCAC  
CAGGCTGGACATATTTACAGTTTCATCATGAAGGCTGACTGTTTGTTAATTATGACATTA  
ATGGCAGTGGTGGCAGCCGACTTCTACAACCTCCAAGTACGACAGTTTTGATGTCCAGC  
CC  
TACTGGAGAATGATAGGATACTACTGAGCTACACTAAATGTTTCCTAGACCAAGGACC  
T  
TGTA CTCTGACGCCAAAGATTTCAAAAAATAATACCTGAAGCTCTAGAACTACGT  
GT  
GGTAAATGCAGTCCAAAGCAGAAACAATTAATAAAGAAAGTAATCAAGGCTGTGATAG  
CT  
AAACACCCTGAGGCTTGGGAACAACCTCAGTGATAAATACGACAAGGACAAAAAGTAT  
AAA  
GACTCCTTCGACAAATTCTTAGCCGAAAAAGAATAA

> comp20083\_c0 (SlitCSP 17)

ACGCCGCAAGAGGAGCACTTGCACAACCTTTCTTTCCGGTAACCAATAACATGAGGAGCT  
GG  
CTGTTATGTCTGTGTGTGCTGACGGTGGTGGTGTGCTACTCCCAAGCCAATCGCTA  
C  
GAGAACTTCAACCCTGATGCCATCGTACAAAACGACAGGATTCTGCTAGCTTACTACA

AG  
TGC GTGATGGACAAAGGACCTTGCACGAGAGACGGCAAGAATTTCAAACGTGTTTTAC  
CA  
GAGACGCTGGCCACTGCGTGCGGGCGCTGCAACCCTAAACAGAAGACGATCGTGCGC  
AAG  
CTTCTCCTGGGCATCAGGTCCAAGAGCGAACCTCGTTTCCTAGAACTCCTGGACAAAT  
AC  
AACCTGACCGCTCCAACAGAGATGCTTTATACGCTTTCCTTGTAACCGGTGCTTAA  
> comp20502\_c0 (SlitCSP13)  
CATCCTATTACAGTATCACGCATCATCATGAAACTAGTAATCATCTTGGCGTTGGTGGCA  
GTAGCCCTGGCCC GCCCTGATGACGGTGGCTTCTACGACAAGAAGTACGATAGCTTCA  
AC  
GCTGATGAGCTCATTGAAAATGAACGTTTGCTGAAATCGTACGCGCACTGTTTCCTCGG  
T  
GATGGCAAGTGC ACTCCAGAAGGAAACGATTTCAAGAAATGGATCCCTGAAGCCACA  
ACG  
ACATCTTGTGGGAAGTGCACGGAAAAACAAAAGGCTCTCATTGCAAAA ACTATCAAG  
GCG  
ATCAAGGACAAACTTCCAACAGAATATGAAGCTCTAATAAAGAAGCACGACCCTGAAA  
AT  
AAACACCATGACGACCTCGACAAGTTCCTACAGAAATACTCTCATTAG  
> comp20836\_c0 (SlitCSP11)  
GAAGGGATATCTGAAAATCTAAACATGAAGAGCATCCTAGTTCTGTGCTTGTGGTCCG  
G  
GCTGTCTCCTGCAGACCAGAGAGTTACGACACTAGATATGACAACTTTGATGTTGAAG  
CC  
TTGGTCGGCAACGTTTCGACTGCTGACTGCGTACGGTCACTGCTTTCCTTGGCAATGGAC  
CT  
TGCACTCCAGAGGGAAGTGCTTTTAAAAAAACCATCCCCGACGCTCTTAGGACCGGCT  
GT  
GGCAAATGTTACCGAAACAGCGTCACTTGATCCGTGTCGTTGTACAAGGCTTCCAAA  
AT  
AAGACCCCAGCCCTTTGGCAGGACCTGGTCAAGAAGCAGGACCCCAACGGACAGTAC  
AAA  
GAAATCTTACCAGGTTCTTGAACGGCAGAGACTAA  
> comp19065\_c0 (SlitCSP3)  
AAGAAATCAACTGTGAAAATGAGGGTTCTGGTTGTA CTGTCGTGCTTGGTCGTGGTGG  
TT  
TTCGCTGCTGATAAATACAACCCTAAATATGATAACTTTGACGTGGAGACCCTGATCTCC  
AACGACAGATTGCTGAAGGCATACATCAACTGCTTCTTGGAAAAAGGACGTTGCACGC  
CC  
GAAGGATCAGATTTTAAAAAGGCCCTCCCCGAGGCGATAGAACTACTTGC GCGAAGT  
GC  
ACAGACAAACAGAAGGGTAACATCAGAAAGGTGATCAAGGCCATCCAGCAGAAACAC



CCC  
AAGGAGTGGGAAGACCTCGTCAAGAAGAATGACCCCAGCGGCAAACACCGCGGTAA  
CTTC  
GACAAATTCATCCAGGGAAGCAGCTAA  
> comp40932\_c0 (SlitCSP18)  
TTGGGACATCAGATCACACGAATCGCAATAAAATTCAAATGAACGCGCTACTGATAGC  
T  
GTCTTCGCCTTAGCTGCTCCACTTGCCTTTGGCTATGACGAAAAATATGACAAATTAGA  
C  
GTCGACAAGATTCTGGGAGATGATGCACTTTTCACCGCATACTTAATTGCATGTTGGA  
T  
AAGGGACCCTGCTCTGTAGAACATTCTGCTGATTCAGACAATTGCTGCCCCGAAGTGAT  
A  
GCCACAGCTTGCAGAGAAATGCACTCCATACAGAGGCAAATGTCAGGAAGACAGTC  
AAG  
GCTCTCAGTGAGAAGAAACCTGATGACTTCGTCCAATTCCGAGCCAAATTCGATCCTA  
AA  
GGCGAATACGAAAAGGCCTTCAGTGCTTTCGTCATCGGTACCGACTAA  
> comp203796\_c0 (SlitCSP19)  
ATTGCAGTAATGAACGGTGCAAGTAAATGCAACTTGTTAATTTTTATGTTTCTATTTGTT  
GCAACTGTTGTTTCGCAAGAGAAGTTCTATGATAGAAGATACGATTATTACGAAATAGA  
C  
ACTTTGATACAGAATCCTAGGTTACTGAAGAAGTATTTGGATTGTTTTCTTTGGAAAGG  
A  
CCCTGTACACCCATAGGAAGAGTGTTTCAGACAAATCCTGCCCCGAAGCGGTTTCAGACAG  
CG  
TGTAAGAAGTGCACTCCATCACAGCGGCGACTGGCAAGAAAAACGTTCAACGCTTTC  
AAG  
GGATATTTCCAGAGATACATGAGGAACTGAGGAAGAACTTGACCCAAAAACAAGT  
AC  
TATGAA  
> comp19506\_c0 (SlitCSP12.2)  
GCATTATTCGTCCACAACCTTTTATTCTTAAATAGGAATATCAATCCTGACACGATGAAG  
TGCATCTACGTGTTATCTGTTCTGCTGGTTTTTGCTGCTGTCCAGGCTGACGAGAAGTA  
C  
AGCTCGGAGAATGATGACCTGGACATCGACGCCGTGGTAGCTGACGTTGATGCCCTCA  
AA  
GGCTTTGTTGGGTGCTTCATGGACGCTGTGACTTGCCACGCTGTTGCTGCCGATTTCAA  
A  
AAGGATCTTCTGAAGCGGTAGCGACAAGCTGCTCTAAATGTACGGATGCCCAGAAGC  
AT  
ATCTCCACAGGTTCTTCTCGGACTGAAACAGAAGCTGCCTGCTGACTACGAAGCCT  
TC  
AAGAAGAAGTTTGACCCTGAAGGTCTACACTTCCATACTTGTGAGGCCAATGTTGCCA

AC  
TCTTAA  
> comp22263\_c0 (SlitCSP12.1)  
CTAGACTATCAATCGTTAGACCGTTTTGGTTTTAGTCTGCATCAATCCAGTTCGGGACG  
C  
GTCCTCTTCAATAGAAGCAAAATGAAGTACATATTAGTGGCTCTCGTTGTAACCATAGC  
G  
GTGGTGGACGCTCAAGAAACGTATGGGACCGAATATGATAATGTAAATGGAGAAGCTA  
TC  
GTTTCTGATGACAAACAGTTCCAAGGATTTGTCGACTGTTTCACGGGCGCTGCTCCTTG  
C  
AACGAGCCTGCTGCTGCTTTCAAAGGGTTTTACCTGAAGCGATTGTACAGGCTTGTG  
GC  
AAATGTAATCCAGCACAAAAGCACTTAGTAAGGCTTTTCTTAGAAGCCTACTCGAAGA  
AA  
AGGCCACAAGAGTACGAAAAGTTCAAAGATTTATTTGATCCTGAAAGGAAATACTTTC  
CC  
AAATTCGAAGCATCCGTTGCCGGGTTTTAA
